# Supplementary material
Source: PubMed Central journal article supplement (PMC4351552)
Supplement: NIHMS600601-supplement-01.pdf [file NIHMS600601-supplement-01.pdf]

# Supplemental Appendix

TABLE A1—PRINCIPAL DIAGNOSES IN MAIN ANALYSIS

| 3-digit Principal Diagnosis                                           | ICD-9 Category<br>(1) | Weekend Rate of Admission<br>(2) | Observations<br>(3) |
|-----------------------------------------------------------------------|-----------------------|----------------------------------|---------------------|
| 038 Septicemia                                                        | All Other             | 0.265                            | 31,206              |
| 162 Malignant neoplasm of trachea, bronchus, and lung                 | All Other             | 0.269                            | 3,728               |
| 197 Secondary malignant neoplasm of respiratory and digestive systems | All Other             | 0.269                            | 2,656               |
| 410 Acute myocardial infarction                                       | Circulatory           | 0.270                            | 33,111              |
| 431 Intracerebral hemorrhage                                          | Circulatory           | 0.282                            | 6,287               |
| 433 Occlusion and stenosis of precerebral arteries                    | Circulatory           | 0.264                            | 3,904               |
| 434 Occlusion of cerebral arteries                                    | Circulatory           | 0.274                            | 31,836              |
| 435 Transient cerebral ischemia                                       | Circulatory           | 0.274                            | 12,320              |
| 482 Other bacterial pneumonia                                         | Respiratory           | 0.269                            | 4,098               |
| 486 Pneumonia, organism unspecified                                   | Respiratory           | 0.272                            | 41,034              |
| 507 Pneumonitis due to solids and liquids                             | Respiratory           | 0.278                            | 11,383              |
| 518 Other diseases of lung                                            | Respiratory           | 0.272                            | 17,501              |
| 530 Diseases of esophagus                                             | Digestive             | 0.268                            | 4,105               |
| 531 Gastric ulcer                                                     | Digestive             | 0.265                            | 4,533               |
| 532 Duodenal ulcer                                                    | Digestive             | 0.280                            | 3,175               |
| 557 Vascular insufficiency of intestine                               | Digestive             | 0.279                            | 2,603               |
| 558 Other and unspecified noninfectious gastroenteritis and colitis   | Digestive             | 0.282                            | 3,038               |
| 560 Intestinal obstruction without mention of hernia                  | Digestive             | 0.277                            | 8,075               |
| 599 Other disorders of urethra and urinary tract                      | All Other             | 0.265                            | 21,748              |
| 728 Disorders of muscle, ligament, and fascia                         | All Other             | 0.257                            | 2,558               |
| 780 General symptoms                                                  | All Other             | 0.286                            | 35,277              |
| 807 Fracture of rib(s), sternum, larynx, and trachea                  | Injury                | 0.276                            | 2,254               |
| 808 Fracture of pelvis                                                | Injury                | 0.264                            | 6,056               |
| 820 Fracture of neck of femur                                         | Injury                | 0.267                            | 50,790              |
| 823 Fracture of tibia and fibula                                      | Injury                | 0.264                            | 2,054               |
| 824 Fracture of ankle                                                 | Injury                | 0.266                            | 4,358               |
| 959 Injury, other and unspecified                                     | Injury                | 0.257                            | 756                 |
| 965 Poisoning by analgesics, antipyretics, and antirheumatics         | Injury                | 0.265                            | 635                 |
| 969 Poisoning by psychotropic agents                                  | Injury                | 0.283                            | 622                 |

Note: 29 principal diagnoses were chosen as diagnoses that had a weekend admission rate that was as close or closer to 2/7 as hip fracture in the full inpatient Medicare data. Weekend admission rates reported here are those in the main analysis sample, which is limited to ambulance transfers. Results are nearly identical when the broader category of "General symptoms" are excluded from the analysis.

Source: 2002-2010 Medicare Part A Claims Data

TABLE A2—SUMMARY STATISTICS: AMBULANCE SAMPLE

|                                                | ER Admissions:       |           |  | ER Admissions:       |           |  | Analysis Sample |           |  |
|------------------------------------------------|----------------------|-----------|--|----------------------|-----------|--|-----------------|-----------|--|
|                                                | Nondeferrable Sample |           |  | Nondeferrable Sample |           |  | Analysis Sample |           |  |
|                                                | Mean                 | Std. Dev. |  | Mean                 | Std. Dev. |  | Mean            | Std. Dev. |  |
| Hospital Cost from ER Admission                | 8.809                | 0.858     |  | 8.925                | 0.831     |  | 8.937           | 0.839     |  |
| Mean Hospital log(Spending) from ER Admissions | 8.809                | 0.218     |  | 8.925                | 0.218     |  | 8.937           | 0.222     |  |
| 1-Year Mortality                               | 0.328                | 0.469     |  | 0.357                | 0.479     |  | 0.365           | 0.481     |  |
| Age                                            | 80.89                | 7.769     |  | 81.405               | 7.778     |  | 81.366          | 7.799     |  |
| Male                                           | 0.382                | 0.486     |  | 0.379                | 0.485     |  | 0.379           | 0.485     |  |
| Race: White                                    | 0.879                | 0.326     |  | 0.888                | 0.315     |  | 0.884           | 0.32      |  |
| Race: Black                                    | 0.084                | 0.277     |  | 0.075                | 0.264     |  | 0.078           | 0.267     |  |
| Ambulance Payment                              | 308.251              | 122.084   |  | 308.886              | 121.914   |  | 308.383         | 121.141   |  |
| Ambulance Distance                             | 7.199                | 8.205     |  | 7.125                | 8.121     |  | 6.871           | 8.007     |  |
| Advanced Life Support                          | 0.66                 | 0.474     |  | 0.668                | 0.471     |  | 0.664           | 0.472     |  |
| Ambulance: Emergency Transport                 | 0.865                | 0.341     |  | 0.867                | 0.34      |  | 0.867           | 0.34      |  |
| Ambulance: Outpatient Claim                    | 0.06                 | 0.237     |  | 0.06                 | 0.238     |  | 0.06            | 0.238     |  |
| Observations                                   | 964,562              | 964,562   |  | 451,039              | 451,039   |  | 351,701         | 351,701   |  |

*Note:* The nondeferrable sample includes diagnoses most likely to require immediate medical care, as described in the text. The ambulance sample includes measures of ambulance inputs, some of which are only available for data from the Centers for Medicare and Medicaid's Carrier file, as opposed to outpatient reimbursement. The analysis sample excludes observations that are not linked to a hospital service area (HSA), patients who were treated more than 50 miles from the ZIP code of their mailing address, patients with missing cost information, and a minimum of 10 observations in the analysis sample for each ZIP code, hospital, and ambulance company.

*Source:* 2002-2010 Medicare Part A Claims Data

TABLE A3—BALANCE: DISCHARGE CONDITION ICD-9 CODE

|                                                                       | 1st Quartile | 2nd Quartile | 3rd Quartile | 4th Quartile |
|-----------------------------------------------------------------------|--------------|--------------|--------------|--------------|
| 038 Septicemia                                                        | 0.093        | 0.092        | 0.082        | 0.088        |
| 162 Malignant neoplasm of trachea, bronchus, and lung                 | 0.011        | 0.011        | 0.010        | 0.011        |
| 197 Secondary malignant neoplasm of respiratory and digestive systems | 0.008        | 0.008        | 0.007        | 0.007        |
| 410 Acute myocardial infarction                                       | 0.099        | 0.101        | 0.089        | 0.088 **     |
| 431 Intracerebral hemorrhage                                          | 0.019        | 0.020        | 0.017        | 0.017 **     |
| 433 Occlusion and stenosis of precerebral arteries                    | 0.011        | 0.011        | 0.011        | 0.011        |
| 434 Occlusion of cerebral arteries                                    | 0.089        | 0.096        | 0.090        | 0.087        |
| 435 Transient cerebral ischemia                                       | 0.032        | 0.035        | 0.037        | 0.035        |
| 482 Other bacterial pneumonia                                         | 0.012        | 0.011        | 0.012        | 0.012        |
| 486 Pneumonia, organism unspecified                                   | 0.115        | 0.113        | 0.119        | 0.120        |
| 507 Pneumonitis due to solids and liquids                             | 0.036        | 0.030        | 0.030        | 0.034        |
| 518 Other diseases of lung                                            | 0.051        | 0.052        | 0.048        | 0.048        |
| 530 Diseases of esophagus                                             | 0.012        | 0.012        | 0.011        | 0.012        |
| 531 Gastric ulcer                                                     | 0.013        | 0.014        | 0.012        | 0.013        |
| 532 Duodenal ulcer                                                    | 0.009        | 0.009        | 0.009        | 0.009        |
| 557 Vascular insufficiency of intestine                               | 0.008        | 0.007        | 0.007        | 0.007        |
| 558 Other and unspecified noninfectious gastroenteritis and colitis   | 0.008        | 0.008        | 0.009        | 0.009        |
| 560 Intestinal obstruction without mention of hernia                  | 0.023        | 0.022        | 0.023        | 0.023        |
| 599 Other disorders of urethra and urinary tract                      | 0.062        | 0.058        | 0.062        | 0.066        |
| 728 Disorders of muscle, ligament, and fascia                         | 0.006        | 0.008        | 0.008        | 0.007        |
| 780 General symptoms                                                  | 0.095        | 0.100        | 0.104        | 0.103        |
| 807 Fracture of rib(s), sternum, larynx, and trachea                  | 0.006        | 0.007        | 0.006        | 0.006        |
| 808 Fracture of pelvis                                                | 0.017        | 0.018        | 0.017        | 0.017        |
| 820 Fracture of neck of femur                                         | 0.144        | 0.134        | 0.153        | 0.146 **     |
| 823 Fracture of tibia and fibula                                      | 0.006        | 0.006        | 0.006        | 0.006        |
| 824 Fracture of ankle                                                 | 0.012        | 0.012        | 0.013        | 0.012        |
| 959 Injury, other and unspecified                                     | 0.002        | 0.002        | 0.002        | 0.002        |
| 965 Poisoning by analgesics, antipyretics, and antirheumatics         | 0.002        | 0.002        | 0.002        | 0.002        |
| 969 Poisoning by psychotropic agents                                  | 0.002        | 0.002        | 0.002        | 0.002        |

Note: N=351,701. The last column reports significance test for difference between 1st and 4th Quartile means (\*  $p < 0.05$ ; \*\*  $p < 0.01$ )  
Source: 2002-2010 Medicare Part A Claims Data

FIGURE A1. DISCHARGE SOURCE BY AMBULANCE INSTRUMENT PERCENTILE

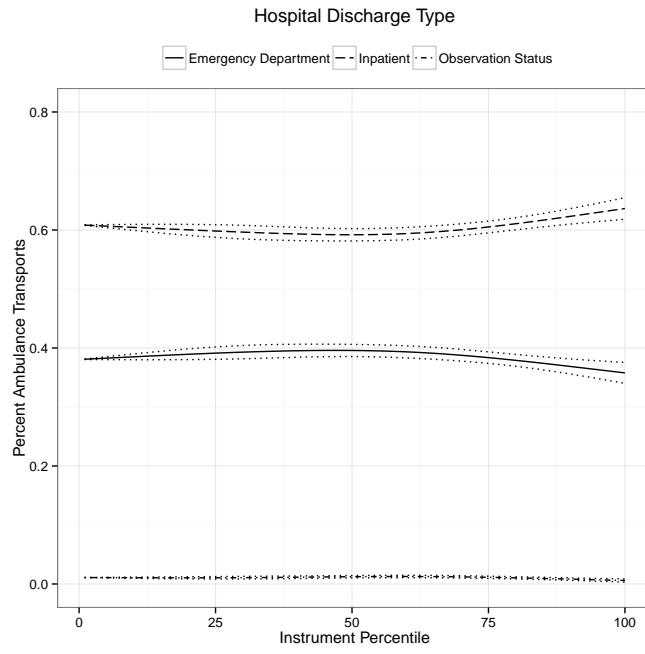

TABLE A4—DECOMPOSITION OF SPENDING

| Dependent Variable: 1-Year Mortality | Inpatient Facility | Doctor (Carrier)    | IME               | Outlier             | Outpatient         |
|--------------------------------------|--------------------|---------------------|-------------------|---------------------|--------------------|
| Avg. log(Hospital Spending)          | -0.056<br>(0.051)  | -0.142<br>(0.040)** | -0.002<br>(0.001) | -0.282<br>(0.072)** | 0.022<br>(0.007)** |
| Observations                         | 351,701            | 351,701             | 351,701           | 351,701             | 351,701            |
| Outcome Mean                         | .364               | .364                | .364              | .364                | .364               |
| Demographic Controls                 | Yes                | Yes                 | Yes               | Yes                 | Yes                |
| Diagnosis Controls                   | Yes                | Yes                 | Yes               | Yes                 | Yes                |
| Ambulance Controls                   | Yes                | Yes                 | Yes               | Yes                 | Yes                |
| Comorbidity Controls                 | Yes                | Yes                 | Yes               | Yes                 | Yes                |
| ZIP Code Fixed Effects               | Yes                | Yes                 | Yes               | Yes                 | Yes                |

*Note:* N=351,701. Each cell represents a separate model analogous to those estimated in Table 3. Each column reports model results based on various measures of spending that, when summed across types, equal our total spending measure: total hospital average log(Hospital Spending) for facility payments, physician reimbursement, graduate medical education (IME), outlier spending, and any outpatient facility use (including observation status). All models include full controls. Standard errors in parentheses, clustered at the HSA level. \* significant at 5%; \*\* significant at 1%.

*Source:* 2002-2010 Medicare Part A Claims Data

TABLE A5—PATIENT CHARACTERISTICS ACROSS BORDERS (BLOCK GROUPS)

| Sample:                                            | Census Block Groups within 1- mile of a Border |                | Census Block Groups within 2- miles of a Border |                | Census Block Groups within 5- miles of a Border |                |
|----------------------------------------------------|------------------------------------------------|----------------|-------------------------------------------------|----------------|-------------------------------------------------|----------------|
|                                                    | Low Cost Side                                  | High Cost Side | Low Cost Side                                   | High Cost Side | Low Cost Side                                   | High Cost Side |
| Comorbidity: Acute Myocardial Infarction           | 0.060                                          | 0.062          | 0.059                                           | 0.062*         | 0.057                                           | 0.061**        |
| Comorbidity: Congestive Heart Failure              | 0.171                                          | 0.165*         | 0.171                                           | 0.166*         | 0.173                                           | 0.170          |
| Comorbidity: Peripheral Vascular Disease           | 0.036                                          | 0.035          | 0.035                                           | 0.034          | 0.034                                           | 0.034          |
| Comorbidity: Cerebrovascular Disease               | 0.082                                          | 0.085          | 0.082                                           | 0.085*         | 0.083                                           | 0.085          |
| Comorbidity: Dementia                              | 0.042                                          | 0.043          | 0.041                                           | 0.042          | 0.040                                           | 0.042          |
| Comorbidity: Chronic Obstructive Pulmonary Disease | 0.194                                          | 0.191          | 0.196                                           | 0.193          | 0.193                                           | 0.194          |
| Comorbidity: Rheumatoid Disease                    | 0.020                                          | 0.019          | 0.020                                           | 0.018*         | 0.019                                           | 0.017          |
| Comorbidity: Peptic Ulcer                          | 0.014                                          | 0.013          | 0.014                                           | 0.014          | 0.015                                           | 0.014          |
| Comorbidity: Mild Liver Disease                    | 0.004                                          | 0.004          | 0.004                                           | 0.004          | 0.004                                           | 0.004          |
| Comorbidity: Diabetes                              | 0.195                                          | 0.197          | 0.196                                           | 0.201          | 0.200                                           | 0.204          |
| Comorbidity: Diabetes with Complications           | 0.019                                          | 0.020          | 0.019                                           | 0.020          | 0.019                                           | 0.020          |
| Comorbidity: Hemiplegia or Paraplegia              | 0.031                                          | 0.033          | 0.031                                           | 0.032          | 0.031                                           | 0.032          |
| Comorbidity: Renal Disease                         | 0.020                                          | 0.020          | 0.020                                           | 0.021          | 0.020                                           | 0.021          |
| Comorbidity: Cancer                                | 0.036                                          | 0.036          | 0.036                                           | 0.036          | 0.036                                           | 0.036          |
| Comorbidity: Moderate or Severe Liver Disease      | 0.002                                          | 0.002          | 0.002                                           | 0.002          | 0.002                                           | 0.003          |
| Comorbidity: Metastatic Cancer                     | 0.031                                          | 0.033*         | 0.031                                           | 0.033*         | 0.031                                           | 0.032          |
| Comorbidity: AIDS                                  | 0.001                                          | 0.001          | 0.001                                           | 0.001          | 0.001                                           | 0.001          |
| Number of Cross-border Pairs                       | 336                                            |                | 482                                             |                | 583                                             |                |

Areas represented are distances from US Census Block Group centroids to an ambulance service-area boundary.

2000-2006 SPARCS Inpatient Data

\* significant at 5%, \*\* significant at 1%

TABLE A6—NYS BORDER STRATEGY: FIRST STAGE, OLS & 2SLS- NONELDERLY (AGE 18-64)

|                                    | A. Dependent Variable: Mean Hospital log(Spending) |                          |                           | B. Dependent Variable: 1-year Mortality |                         |                          |
|------------------------------------|----------------------------------------------------|--------------------------|---------------------------|-----------------------------------------|-------------------------|--------------------------|
|                                    | 1 mile                                             | 2 miles                  | 5 miles                   | 1 mile                                  | 2 miles                 | 5 miles                  |
| Ambulance Dispatch Area:           |                                                    |                          |                           |                                         |                         |                          |
| Mean Hospital log(Spending)        | 0.727<br>(0.150)**                                 | 0.713<br>(0.151)**       | 0.73<br>(0.154)**         | 0.712<br>(0.150)**                      | 0.662<br>(0.139)**      | 0.644<br>(0.137)**       |
| Year Controls                      | Yes                                                | Yes                      | Yes                       | Yes                                     | Yes                     | Yes                      |
| Demographic Controls               | No                                                 | Yes                      | No                        | Yes                                     | No                      | Yes                      |
| Diagnosis and Comorbidity Controls | No                                                 | Yes                      | No                        | Yes                                     | No                      | Yes                      |
| Observations                       | 114648                                             | 114648                   | 175161                    | 175161                                  | 233616                  | 233616                   |
| Mean of Dep. Var.                  | 8.460                                              | 8.460                    | 8.457                     | 8.457                                   | 8.463                   | 8.463                    |
|                                    | 1 mile OLS                                         |                          |                           | 2 miles OLS                             |                         |                          |
| Mean Hospital log(Spending)        | (1)<br>0.006<br>(0.004)                            | (2)<br>-0.008<br>(0.005) | (3)<br>0.010<br>(0.003)** | (4)<br>-0.005<br>(0.004)                | (5)<br>0.013<br>(0.004) | (6)<br>-0.003<br>(0.003) |
|                                    | 2SLS                                               |                          |                           | 2SLS                                    |                         |                          |
| Mean Hospital log(Spending)        | 0.004<br>(0.008)                                   | -0.019<br>(0.013)        | 0.007<br>(0.011)          | -0.011<br>(0.013)                       | 0.012<br>(0.013)        | -0.010<br>(0.012)        |
| Year Controls                      | Yes                                                | Yes                      | Yes                       | Yes                                     | Yes                     | Yes                      |
| Demographic Controls               | No                                                 | Yes                      | No                        | Yes                                     | No                      | Yes                      |
| Diagnosis and Comorbidity Controls | No                                                 | Yes                      | No                        | Yes                                     | No                      | Yes                      |
| Observations                       | 114648                                             | 114648                   | 175161                    | 175161                                  | 233616                  | 233616                   |
| Mean of Dep. Var.                  | 0.053                                              | 0.053                    | 0.054                     | 0.054                                   | 0.055                   | 0.055                    |

Each cell represents a separate model analogous to those estimated in Table 8. All models include boundary fixed effects. Demographic controls include indicators for age, race, sex, miles from the hospital to the block-group centroid, and US Census block-group characteristics. Diagnosis controls include the patient's three-digit principal diagnosis code. Comorbidities included are those listed in Table A5 aggregated into 4 categories by diagnosis type. Standard errors in parentheses, clustered at the ambulance service-area level.

\* significant at 5%; \*\* significant at 1%  
2000-2006 SPARCS Inpatient Data



TABLE A7—NYS BORDER STRATEGY: FIRST STAGE, OLS & 2SLS- NEAR-ELDERLY (AGE 50-64)

|                                                           | 1 mile                   |                          |                          | 2 miles                  |                          |                          | 5 miles |  |  |
|-----------------------------------------------------------|--------------------------|--------------------------|--------------------------|--------------------------|--------------------------|--------------------------|---------|--|--|
|                                                           | (1)                      | (2)                      | (3)                      | (4)                      | (5)                      | (6)                      |         |  |  |
| <b>A. Dependent Variable: Mean Hospital log(Spending)</b> |                          |                          |                          |                          |                          |                          |         |  |  |
| Ambulance Dispatch Area:                                  |                          |                          |                          |                          |                          |                          |         |  |  |
| Mean Hospital log(Spending)                               | 0.645<br>(0.179)**       | 0.645<br>(0.174)**       | 0.603<br>(0.179)**       | 0.602<br>(0.170)**       | 0.55<br>(0.160)**        | 0.549<br>(0.153)**       |         |  |  |
| Year Controls                                             | Yes                      | Yes                      | Yes                      | Yes                      | Yes                      | Yes                      |         |  |  |
| Demographic Controls                                      | No                       | Yes                      | No                       | Yes                      | No                       | Yes                      |         |  |  |
| Diagnosis and Comorbidity Controls                        | No                       | Yes                      | No                       | Yes                      | No                       | Yes                      |         |  |  |
| Observations                                              | 56788                    | 56788                    | 86884                    | 86884                    | 115955                   | 115955                   |         |  |  |
| Mean of Dep. Var.                                         | 8.588                    | 8.588                    | 8.587                    | 8.587                    | 8.595                    | 8.595                    |         |  |  |
| <b>B. Dependent Variable: 1-year Mortality</b>            |                          |                          |                          |                          |                          |                          |         |  |  |
|                                                           | 1 mile                   |                          |                          | 2 miles                  |                          |                          | 5 miles |  |  |
|                                                           | OLS                      |                          |                          | OLS                      |                          |                          | OLS     |  |  |
| Mean Hospital log(Spending)                               | (1)<br>0.005<br>(0.005)  | (2)<br>-0.009<br>(0.005) | (3)<br>0.008<br>(0.004)  | (4)<br>-0.006<br>(0.005) | (5)<br>0.012<br>(0.005)  | (6)<br>-0.004<br>(0.004) |         |  |  |
|                                                           | 2SLS                     |                          |                          | 2SLS                     |                          |                          | 2SLS    |  |  |
| Mean Hospital log(Spending)                               | (1)<br>-0.015<br>(0.023) | (2)<br>-0.012<br>(0.022) | (3)<br>-0.008<br>(0.025) | (4)<br>-0.013<br>(0.020) | (5)<br>-0.003<br>(0.029) | (6)<br>-0.018<br>(0.021) |         |  |  |
| Year Controls                                             | Yes                      | Yes                      | Yes                      | Yes                      | Yes                      | Yes                      |         |  |  |
| Demographic Controls                                      | No                       | Yes                      | No                       | Yes                      | No                       | Yes                      |         |  |  |
| Diagnosis and Comorbidity Controls                        | No                       | Yes                      | No                       | Yes                      | No                       | Yes                      |         |  |  |
| Observations                                              | 56788                    | 56788                    | 86884                    | 86884                    | 115955                   | 115955                   |         |  |  |
| Mean of Dep. Var.                                         | 0.081                    | 0.081                    | 0.082                    | 0.082                    | 0.083                    | 0.083                    |         |  |  |

Each cell represents a separate model analogous to those estimated in Table 8. All models include boundary fixed effects. Demographic controls include indicators for age, race, sex, miles from the hospital to the block-group centroid, and US Census block-group characteristics. Diagnosis controls include the patient's three-digit principal diagnosis code. Comorbidities included are those listed in Table A5 aggregated into 4 categories by diagnosis type. Standard errors in parentheses, clustered at the ambulance service-area level. \* significant at 5%; \*\* significant at 1%

2000-2006 SPARCS Inpatient Data

TABLE A8—NYS BORDER STRATEGY: 2SLS RESULTS FOR SUBGROUPS

| Dependent Variable: 1-Year Mortality                        | Coefficient | S.E.    | Obs.    | Mean 1-year Mortality |
|-------------------------------------------------------------|-------------|---------|---------|-----------------------|
|                                                             | (1)         | (2)     | (3)     | (4)                   |
| <b>Sample: Census block-groups within 5-miles of border</b> |             |         |         |                       |
| By Diagnosis Category                                       |             |         |         |                       |
| Circulatory                                                 | -0.061 *    | (0.028) | 80,153  | 0.236                 |
| Respiratory                                                 | -0.1118**   | (0.041) | 57,894  | 0.323                 |
| Digestive                                                   | 0.041       | (0.038) | 29,829  | 0.147                 |
| Injury                                                      | -0.097*     | (0.040) | 35,093  | 0.157                 |
| Other                                                       | -0.008      | (0.025) | 78,067  | 0.243                 |
| By Diagnosis Mortality Rate Quartile                        |             |         |         |                       |
| Bottom Quartile                                             | -0.011      | (0.030) | 70,335  | 0.088                 |
| 2nd                                                         | -0.069      | (0.036) | 37,651  | 0.168                 |
| 3rd                                                         | -0.058*     | (0.027) | 131,573 | 0.243                 |
| Top Quartile                                                | -0.092      | (0.054) | 41,477  | 0.527                 |

Each cell represents a separate model. All models include full controls. Standard errors in parentheses clustered at the service-area level.

\* significant at 5%, \*\* significant at 1%  
2000-2006 SPARCS Inpatient Data
